# Supplementary material for: Nutritional Analysis of Foods and Beverages Posted in Social Media Accounts of Highly Followed Celebrities
Source: PubMed Central journal article supplement (PMC8756336; doi:10.1001/jamanetworkopen.2021.43087), 2022-01-12
Supplement: jamanetwopen-e2143087-s001.pdf [file jamanetwopen-e2143087-s001.pdf]

## Supplementary Online Content

Turnwald BP, Anderson KG, Markus HR, Crum AJ. Nutritional analysis of foods and beverages posted in social media accounts of highly followed celebrities. *JAMA Netw Open*. 2022;5(1):e2143087. doi:10.1001/jamanetworkopen.2021.43087

**eMethods.** Supplementary Methods

**eTable 1.** Celebrity Demographic Characteristics

**eTable 2.** Detailed Coding Decisions

**eTable 3.** Celebrity-Level and Item-Level Nutrition Ratings for Foods and Beverages

**eTable 4.** Food Nutrition Outcomes by Celebrity and Post Characteristics

**eTable 5.** Sponsored Celebrity Instagram Posts

**eTable 6.** Foods in Sponsored Celebrity Instagram Posts

**eTable 7.** Beverages in Sponsored Celebrity Instagram Posts

**eFigure 1.** Front-of-Package Traffic Light Ratings for Foods, by Celebrity

**eFigure 2.** Beverage Nutrition Outcomes by Celebrity and Post Characteristics

**eReferences**

This supplementary material has been provided by the authors to give readers additional information about their work.

## eMethods. Supplementary Methods

**Coder reliability.** Inter-rater reliability between the two researchers who conducted the coding (the first and second authors) was rigorously monitored at each step. First, to check agreement on the types of foods and beverages depicted in celebrity Instagram posts, both researchers coded which foods and beverages were present in each post for the same random sample of 307 posts (10% of the entire sample), which contained 262 foods and 235 beverages. Codes agreed perfectly in 86.0% of these posts (264 out of 307). Among individual foods and beverage observations, inter-rater reliabilities for agreeing on the type of food and type of beverage present ranged from .80 – .96 for food categories and .85 – .94 for beverage categories that had at least five observations. Second, we determined whether researchers assigned consistent nutritional information to each food and beverage observation. Both researchers assigned the closest matching nutrition code from the Food and Nutrient Database for Dietary Studies (FNDDS)<sup>1</sup> to a random 25% sample of all unique food and beverage items in the data set ( $N = 301$ ). Codes agreed on 92.7% of foods and 96.4% of beverages, indicating high agreement. Third, we determined reliability of coding whether or not a post was sponsored by a food- or beverage-relevant company. Using the same set of 307 posts used to calculate reliability for the types of food and beverages depicted, codes agreed on 96.7% of posts ( $\kappa = .82$ ). Finally, we determined reliability of coding the gender that celebrities presented themselves as, for which coders had 100% agreement. In all cases, disagreements were settled by discussion and the remainder of the data were independently coded.

**eTable 1. Celebrity Demographic Characteristics**

|               | <b>Actor/ TV Personality<br/>(N = 66)</b> |       | <b>Music Artist<br/>(N = 64)</b> |       | <b>Athlete<br/>(N = 51)</b> |       | <b>All Celebrities<br/>(N = 181)</b> |       |
|---------------|-------------------------------------------|-------|----------------------------------|-------|-----------------------------|-------|--------------------------------------|-------|
| <b>Gender</b> |                                           |       |                                  |       |                             |       |                                      |       |
| Male          | 28                                        | 42.4% | 34                               | 53.1% | 40                          | 78.4% | 102                                  | 56.4% |
| Female        | 38                                        | 57.6% | 30                               | 46.9% | 11                          | 21.6% | 79                                   | 43.6% |
| <b>Age</b>    |                                           |       |                                  |       |                             |       |                                      |       |
| 17-29         | 13                                        | 19.7% | 33                               | 51.6% | 11                          | 21.6% | 57                                   | 31.5% |
| 30-39         | 24                                        | 36.4% | 18                               | 28.1% | 34                          | 66.7% | 76                                   | 42.0% |
| 40-49         | 18                                        | 27.3% | 8                                | 12.5% | 6                           | 11.8% | 32                                   | 17.7% |
| 50+           | 11                                        | 16.7% | 5                                | 7.8%  | 0                           | 0.0%  | 16                                   | 8.8%  |

**eTable 2. Detailed Coding Decisions**

| <b>Situation Description</b>                                                                                           | <b>Coding Decision</b>                                                                                |
|------------------------------------------------------------------------------------------------------------------------|-------------------------------------------------------------------------------------------------------|
| Pumpkins that are carved jack-o-lanterns                                                                               | Excluded                                                                                              |
| Food and beverage costumes                                                                                             | Excluded                                                                                              |
| Medicines, cough drops, vitamins                                                                                       | Excluded                                                                                              |
| Salt, pepper, herbs, spices                                                                                            | Excluded because FNDDS does not categorize these foods                                                |
| Generic words on storefronts (e.g., “pizza”, “coffee”)                                                                 | Excluded                                                                                              |
| Foods within beverages (e.g., olives, lemons, limes, cherries)                                                         | Excluded                                                                                              |
| Text describing foods or beverages that are not visible at all                                                         | Excluded                                                                                              |
| Chain/branded storefronts depicted but no foods or beverages (e.g., McDonald’s arches, Burger King sign)               | Excluded                                                                                              |
| Extra toppings such as on cakes, pizza, desserts, sandwiches                                                           | Excluded, toppings did not count as separate items but were sometimes included in relevant FNDDS code |
| Foods or beverages that cannot be identified by the image alone, but are explicitly stated in the post caption         | Included                                                                                              |
| Empty boxes, wrappers, cans, bottles                                                                                   | Included                                                                                              |
| Foods and beverages on signs, posters, t-shirts, paintings                                                             | Included                                                                                              |
| Opaque coffee mugs containing a hot beverage                                                                           | Included, counted as coffee                                                                           |
| Beverages in champagne glasses                                                                                         | Included, counted as champagne                                                                        |
| Salad with unknown salad dressing                                                                                      | Included, used FNDDS code for general salad dressing                                                  |
| Beverages known to be alcoholic from post context but type of alcohol not discernable (e.g., solo cups, opaque bottle) | Included, coded as “Alcoholic beverage, not further specified”                                        |

**eTable 3. Celebrity-Level and Item-Level Nutrition Ratings for Foods and Beverages**

|                              | Celebrity Food Scores |      | All Food Items |      | Celebrity Beverage Scores <sup>a</sup> |      | All Beverage Items |      |
|------------------------------|-----------------------|------|----------------|------|----------------------------------------|------|--------------------|------|
|                              | No.                   | %    | No.            | %    | No.                                    | %    | No.                | %    |
| <b>NPI ratings</b>           |                       |      |                |      |                                        |      |                    |      |
| Healthier                    | 9                     | 5.0  | 974            | 39.5 | 12                                     | 6.6  | 1,225              | 45.2 |
| Less Healthy                 | 158                   | 87.3 | 1,493          | 60.5 | 162                                    | 89.5 | 1,488              | 54.8 |
| No food/bev posts            | 14                    | 7.7  |                |      | 7                                      | 3.9  |                    |      |
| <b>Traffic light ratings</b> |                       |      |                |      |                                        |      |                    |      |
| Sugar                        |                       |      |                |      |                                        |      |                    |      |
| low                          | 14                    | 7.7  | 1,128          | 45.7 |                                        |      |                    |      |
| medium                       | 110                   | 60.8 | 623            | 25.3 |                                        |      |                    |      |
| high                         | 43                    | 23.8 | 716            | 29.0 |                                        |      |                    |      |
| no food posts                | 14                    | 7.7  |                |      |                                        |      |                    |      |
| Saturated fat                |                       |      |                |      |                                        |      |                    |      |
| low                          | 10                    | 5.5  | 989            | 40.1 |                                        |      |                    |      |
| medium                       | 113                   | 62.4 | 669            | 27.1 |                                        |      |                    |      |
| high                         | 44                    | 24.3 | 809            | 32.8 |                                        |      |                    |      |
| no food posts                | 14                    | 7.7  |                |      |                                        |      |                    |      |
| Total fat                    |                       |      |                |      |                                        |      |                    |      |
| low                          | 1                     | 0.6  | 779            | 31.6 |                                        |      |                    |      |
| medium                       | 143                   | 79.0 | 894            | 36.2 |                                        |      |                    |      |
| high                         | 23                    | 12.7 | 794            | 32.2 |                                        |      |                    |      |
| no food posts                | 14                    | 7.7  |                |      |                                        |      |                    |      |
| Sodium                       |                       |      |                |      |                                        |      |                    |      |
| low                          | 53                    | 29.3 | 1,107          | 44.9 |                                        |      |                    |      |
| medium                       | 114                   | 63.0 | 1,311          | 53.1 |                                        |      |                    |      |
| high                         | 0                     | 0.0  | 49             | 2.0  |                                        |      |                    |      |
| no food posts                | 14                    | 7.7  |                |      |                                        |      |                    |      |

<sup>a</sup>Because few beverages contain fat or sodium, traffic light ratings were not calculated for beverages.

NPI = Nutrient Profile Index

**eTable 4. Food Nutrition Outcomes by Celebrity and Post Characteristics**

|                   | <b>NPI score</b>  | <b>Sugar (g)</b>               | <b>Sat. fat (g)</b> | <b>Total fat (g)</b> | <b>Sodium (mg)</b>          | <b>Fiber (g)</b>            |
|-------------------|-------------------|--------------------------------|---------------------|----------------------|-----------------------------|-----------------------------|
| <b>Gender</b>     |                   |                                |                     |                      |                             |                             |
| Male              | 53.0 (51.4, 54.5) | 15.8 (14.2, 17.4) <sup>a</sup> | 4.0 (3.6, 4.4)      | 12.1 (11.3, 13.0)    | 355 (335, 375) <sup>a</sup> | 1.9 (1.7, 2.0) <sup>a</sup> |
| Female            | 52.1 (50.5, 53.7) | 19.3 (17.7, 21.0) <sup>a</sup> | 4.0 (3.6, 4.4)      | 12.4 (11.5, 13.2)    | 321 (300, 343) <sup>a</sup> | 2.1 (2.0, 2.3) <sup>a</sup> |
| <b>Profession</b> |                   |                                |                     |                      |                             |                             |
| Actor             | 53.2 (51.4, 54.9) | 17.0 (15.1, 18.9)              | 4.0 (3.6, 4.4)      | 12.1 (11.2, 13.1)    | 329 (305, 353)              | 2.0 (1.8, 2.2)              |
| Music Artist      | 50.9 (48.8, 52.9) | 18.9 (16.8, 21.1)              | 4.0 (3.5, 4.5)      | 12.8 (11.6, 13.9)    | 357 (328, 385)              | 2.1 (1.9, 2.3)              |
| Athlete           | 53.4 (51.5, 55.3) | 16.7 (14.6, 18.7)              | 4.0 (3.5, 4.4)      | 11.9 (10.9, 13.0)    | 336 (310, 362)              | 1.9 (1.7, 2.1)              |
| <b>Sponsored</b>  |                   |                                |                     |                      |                             |                             |
| Sponsored         | 51.4 (46.4, 56.3) | 20.1 (15.0, 25.3)              | 3.4 (2.2, 4.6)      | 11.5 (8.6, 14.4)     | 364 (287, 439)              | 2.1 (1.6, 2.6)              |
| Not Sponsored     | 52.6 (51.5, 53.7) | 17.4 (16.2, 18.6)              | 4.0 (3.8, 4.3)      | 12.3 (11.7, 12.9)    | 338 (323, 353)              | 2.0 (1.9, 2.1)              |

<sup>a</sup> Rows within column differed significantly from one another ( $P < .05$ )

**eTable 5. Sponsored Celebrity Instagram Posts**

| <b>Sponsor or Product Name</b> | <b>Sponsored posts in this sample</b> |
|--------------------------------|---------------------------------------|
| Proper Twelve Irish Whiskey    | 16                                    |
| Smithworks vodka               | 8                                     |
| Vitamin Well                   | 7                                     |
| Body Armor                     | 6                                     |
| Sugarpova candy                | 6                                     |
| Mulholland Distilling          | 6                                     |
| Wade Cellars                   | 5                                     |
| Ronaldinho Gaucho wine         | 5                                     |
| Iniesta                        | 5                                     |
| Codigo tequila                 | 5                                     |
| Bud Light beer                 | 5                                     |
| Aviation American gin          | 5                                     |
| Blanco tequila                 | 4                                     |
| State Energy water             | 3                                     |
| Jacob's Creek wine             | 3                                     |
| Epigamia                       | 3                                     |
| Red Bull                       | 3                                     |
| Outlaw energy drink            | 2                                     |
| Salt Vine Wines                | 2                                     |
| Chobani                        | 2                                     |
| Cheetos                        | 2                                     |
| Lay's chips                    | 2                                     |
| Ultra Light beer               | 2                                     |
| Haig Club                      | 2                                     |
| Heinz ketchup                  | 2                                     |
| Bragg apple cider vinegar      | 2                                     |
| Poosh                          | 2                                     |
| Herbalife nutrition            | 2                                     |
| Starkist                       | 2                                     |
| TB12                           | 2                                     |
| Cocoa Pebbles                  | 2                                     |
| 800 degrees kitchen            | 1                                     |
| Combat Hunger                  | 1                                     |
| Mod champagne                  | 1                                     |
| Mom's Spaghetti                | 1                                     |
| Pizza My Heart                 | 1                                     |
| Pepsi                          | 1                                     |
| Wheaties                       | 1                                     |
| Laird                          | 1                                     |
| Bai                            | 1                                     |
| Vita Hustle                    | 1                                     |
| Flatotummy                     | 1                                     |
| Usana                          | 1                                     |
| Vrauu                          | 1                                     |
| Malaysia Travel                | 1                                     |
| Corona Light                   | 1                                     |
| Pestana CR7 Lisboa             | 1                                     |
| See's candy                    | 1                                     |
| Olive Oils Spain               | 1                                     |
| Raising Canes Chicken          | 1                                     |
| Miyoko Creamery                | 1                                     |
| The Ellen Shop                 | 1                                     |
| Last Call Beverage             | 1                                     |

|           |   |
|-----------|---|
| Rebbl     | 1 |
| Truth bar | 1 |

**eTable 6. Foods in Sponsored Celebrity Instagram Posts**

| <b>Food Category</b>                                                             | <b>No.</b> | <b>%</b>    |
|----------------------------------------------------------------------------------|------------|-------------|
| <b>Snacks and Sweets</b>                                                         | <b>24</b>  | <b>29.3</b> |
| Candy (candy, chocolate, caramels)                                               | 11         | 13.4        |
| Snack / Meal bars (breakfast bar, energy bar, granola bar)                       | 7          | 8.5         |
| Savory snacks (cheese balls, pretzels, potato chips, popcorn, tortilla chips)    | 5          | 6.1         |
| Crackers                                                                         | 1          | 1.2         |
| Sweet bakery products (cookies, pies, pastries, cakes, donuts, brownies)         | 0          | 0.0         |
| Other desserts (ice cream and frozen dairy desserts, puddings, gelatins)         | 0          | 0.0         |
| <b>Fruits</b>                                                                    | <b>10</b>  | <b>12.2</b> |
| <b>Grains</b>                                                                    | <b>9</b>   | <b>11.0</b> |
| Cereals (ready-to-eat)                                                           | 7          | 8.5         |
| Breads, rolls, tortillas (bread loaves, buns, dinner rolls, tortillas, bagels)   | 2          | 2.4         |
| Quick breads / bread products (biscuits, muffins, pancakes, waffles)             | 0          | 0.0         |
| Cooked grains (dry or plan pasta, noodles, rice)                                 | 0          | 0.0         |
| Cooked cereals (oatmeal, breakfast grits)                                        | 0          | 0.0         |
| <b>Dairy</b>                                                                     | <b>9</b>   | <b>11.0</b> |
| Yoghurt                                                                          | 5          | 6.1         |
| Cheese                                                                           | 4          | 4.9         |
| <b>Mixed Dishes</b>                                                              | <b>7</b>   | <b>8.5</b>  |
| Mixed Dishes – Meat, Poultry, Seafood                                            | 2          | 2.4         |
| Mixed Dishes – Sandwiches (cheeseburger, deli subs, hot dogs, PBJ)               | 1          | 1.2         |
| Mixed Dishes – Grain-based (lasagna, mac and cheese, pasta, rice dishes)         | 1          | 1.2         |
| Mixed Dishes – Pizza                                                             | 1          | 1.2         |
| Mixed Dishes – Soups                                                             | 1          | 1.2         |
| Mixed Dishes – Mexican (burritos, tacos, nachos)                                 | 1          | 1.2         |
| Mixed Dishes – Asian (chow mein, stir-fry, egg rolls, dumplings, sushi)          | 0          | 0.0         |
| <b>Protein</b>                                                                   | <b>6</b>   | <b>7.3</b>  |
| Seafood (fish, shellfish)                                                        | 3          | 3.7         |
| Poultry (chicken, turkey, duck)                                                  | 1          | 1.2         |
| Meats (pork, lamb, beef, goat, game)                                             | 1          | 1.2         |
| Plant-based proteins (nuts, seeds, soy products, beans, legumes)                 | 1          | 1.2         |
| Cured Meats/Poultry (cold cuts, bacon, sausages, hot dogs)                       | 0          | 0.0         |
| Eggs (including omelets)                                                         | 0          | 0.0         |
| <b>Other (protein and nutritional powders)</b>                                   | <b>6</b>   | <b>7.3</b>  |
| <b>Condiments and Sauces</b> (ketchup, mustard, soy sauce, dips, gravy, sauces)  | <b>5</b>   | <b>6.1</b>  |
| <b>Sugars</b> (sugar, honey, sugar substitutes, jams, syrups, toppings)          | <b>3</b>   | <b>3.7</b>  |
| <b>Fats and Oils</b> (butter, cream cheese, whipped cream, mayo, vegetable oils) | <b>2</b>   | <b>2.4</b>  |
| <b>Vegetables</b>                                                                | <b>1</b>   | <b>1.2</b>  |
| Vegetables (dark green, starchy, red/orange, leafy salads, veg mix dishes)       | 1          | 1.2         |
| White potatoes (mashed, baked, fried, boiled, French fries)                      | 0          | 0.0         |

Food categories (bolded) and subcategories (indented) were defined by WWEIA Categories 2015-2016.<sup>2</sup> Percentages out of 82 total foods in posts that were sponsored by food- and beverage-relevant companies.



**eTable 7. Beverages in Sponsored Celebrity Instagram Posts**

| <b>Beverage Category</b>                                  | <b>No.</b> | <b>%</b>    |
|-----------------------------------------------------------|------------|-------------|
| <b>Alcoholic Beverages</b>                                | <b>90</b>  | <b>63.4</b> |
| Liquor and Cocktails                                      | 54         | 38.0        |
| Wine                                                      | 28         | 19.7        |
| Beer                                                      | 8          | 5.6         |
| <b>Sweetened Beverages</b>                                | <b>25</b>  | <b>17.6</b> |
| Sport and Energy drinks                                   | 17         | 12.0        |
| Nutritional beverages                                     | 4          | 2.8         |
| Soft drinks                                               | 3          | 2.1         |
| Smoothies and grain drinks                                | 1          | 0.7         |
| Fruit drinks                                              | 0          | 0.0         |
| <b>Water</b>                                              | <b>17</b>  | <b>12.0</b> |
| Flavored or Enhanced Water                                | 14         | 9.9         |
| Plain Water                                               | 3          | 2.1         |
| <b>Coffee and Tea</b>                                     | <b>6</b>   | <b>4.2</b>  |
| Tea (tea, sweet tea)                                      | 4          | 2.8         |
| Coffee (coffee, cappuccino, blended coffee drinks, mocha) | 2          | 1.4         |
| <b>100% Juices</b>                                        | <b>2</b>   | <b>1.4</b>  |
| Citrus juice                                              | 1          | 0.7         |
| Other fruit juice                                         | 1          | 0.7         |
| Apple juice                                               | 0          | 0.0         |
| Vegetable juice                                           | 0          | 0.0         |
| <b>Diet beverages</b>                                     | <b>2</b>   | <b>1.4</b>  |
| Diet soft drinks                                          | 2          | 1.4         |
| Diet sport and energy drinks                              | 0          | 0.0         |
| Other diet drinks                                         | 0          | 0.0         |
| <b>Dairy Beverages</b>                                    | <b>0</b>   | <b>0.0</b>  |
| Milk                                                      | 0          | 0.0         |
| Milkshakes and Other Dairy Drinks                         | 0          | 0.0         |
| Flavored Milk                                             | 0          | 0.0         |
| Milk Substitutes (almond, soy)                            | 0          | 0.0         |
| <b>Infant formula / Human milk</b>                        | <b>0</b>   | <b>0.0</b>  |

Beverage categories (bolded) and subcategories (indented) were defined by WWEIA Categories 2015-2016.<sup>2</sup> Percentages out of 142 total beverages in posts that were sponsored by food- and beverage-relevant companies.

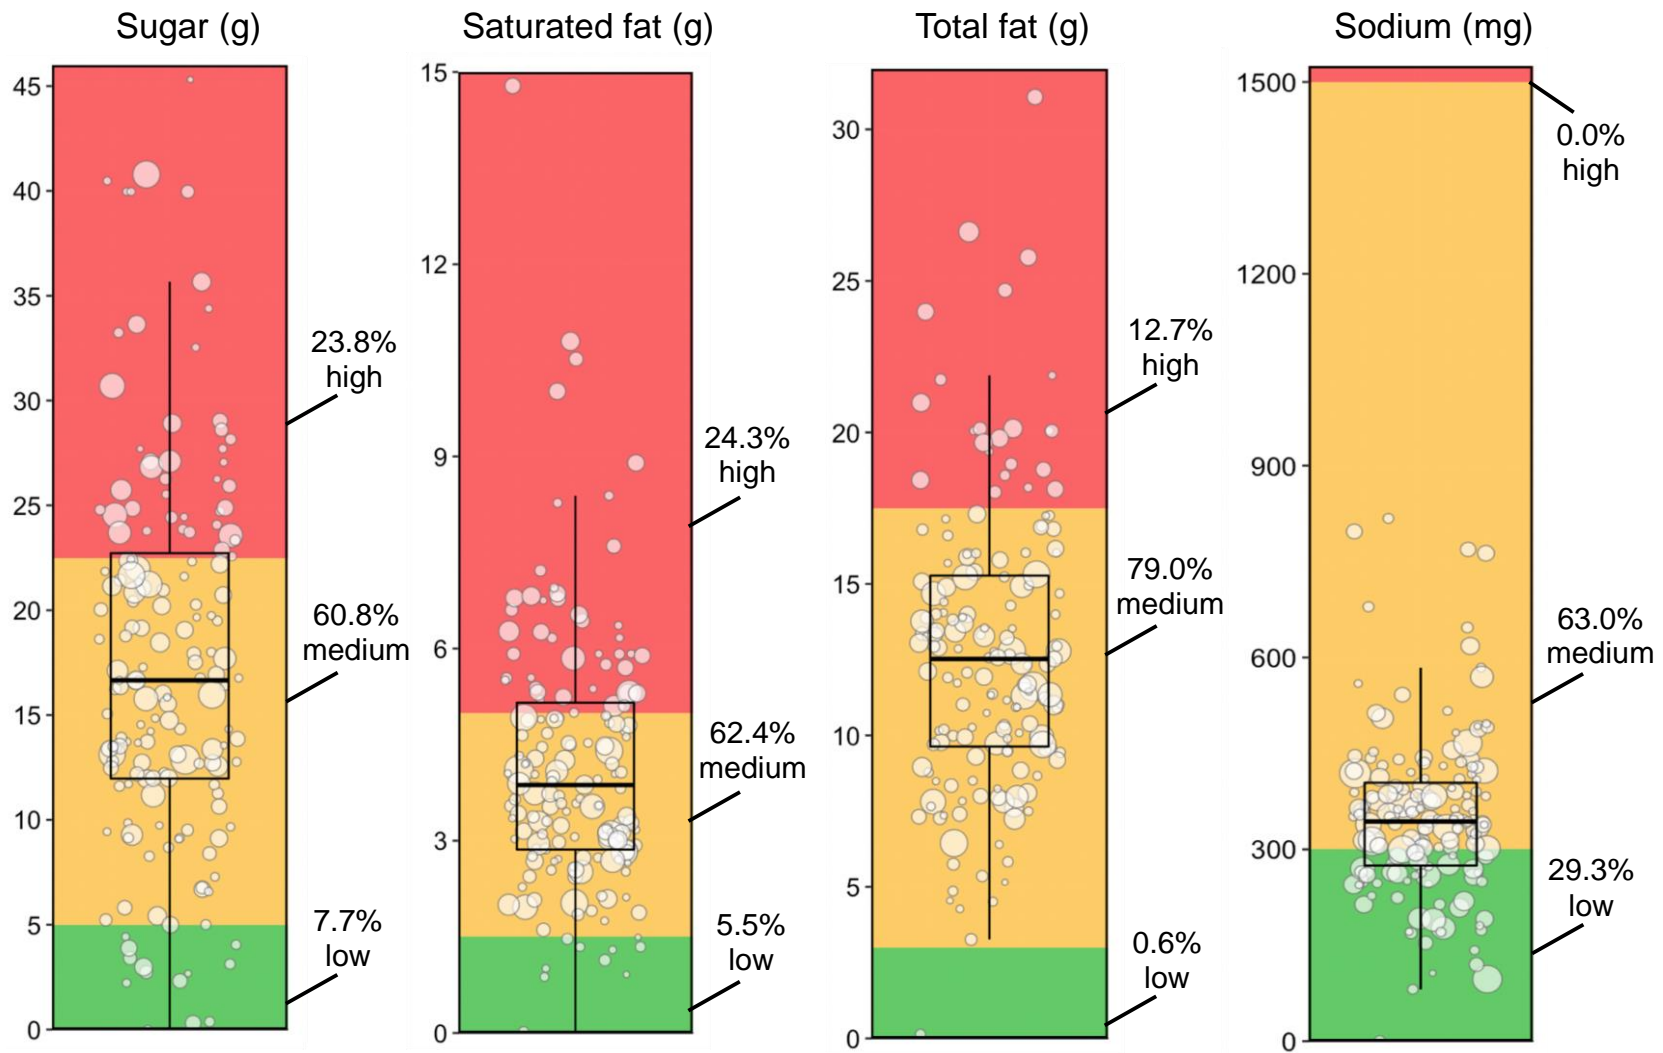

**eFigure 1. Front-of-Package Traffic Light Ratings for Foods, by Celebrity.**

Celebrity Instagram account-level “traffic light” nutrition ratings for foods. Each dot represents one celebrity’s average sugar, saturated fat, total fat, or sodium content per 100 g of food ( $n = 167$  celebrities with at least one post containing food). Percentages do not add to 100 because 7.7% ( $n = 14$  celebrities) had no food-containing posts. Green shading represents low levels (healthiest), amber represents medium, and red represents high levels of each nutrient (least healthy), per Front-of-Package Traffic Light labeling guidelines.<sup>3</sup> Each boxplot inner horizontal line represents the median, boxes represent the interquartile range (25th and 75th percentiles), and vertical whiskers represent 1.5 times the interquartile range. Dot size corresponds to the number of Instagram followers per celebrity.

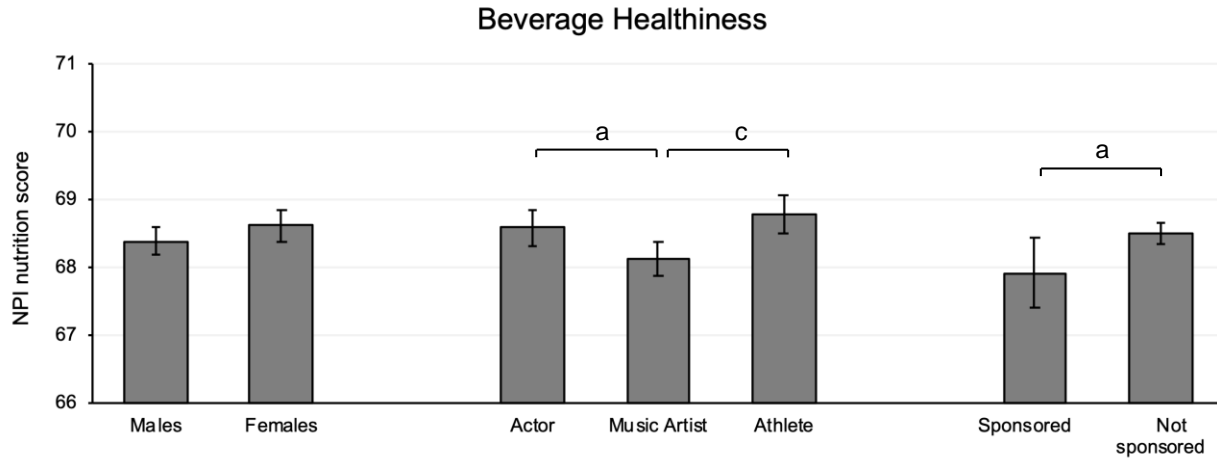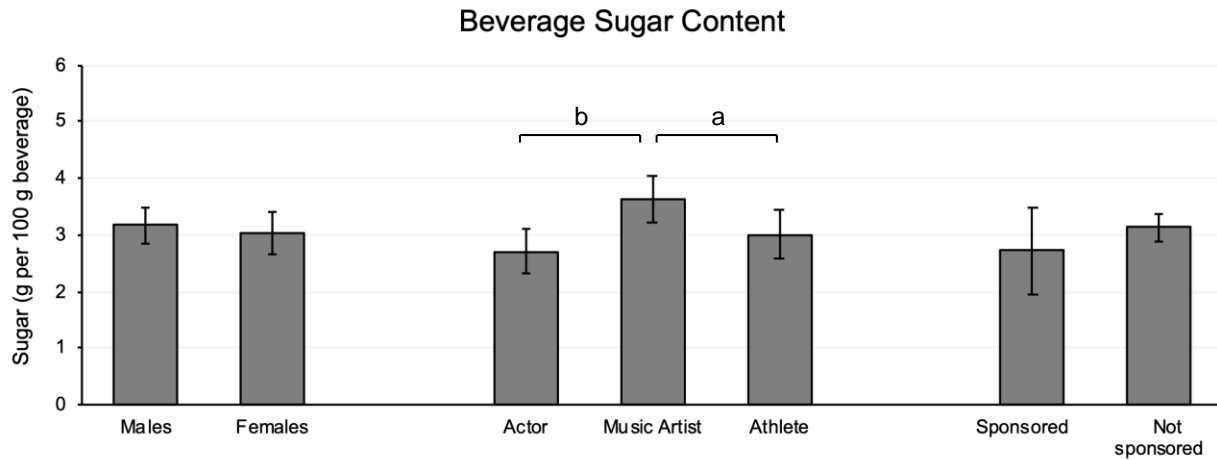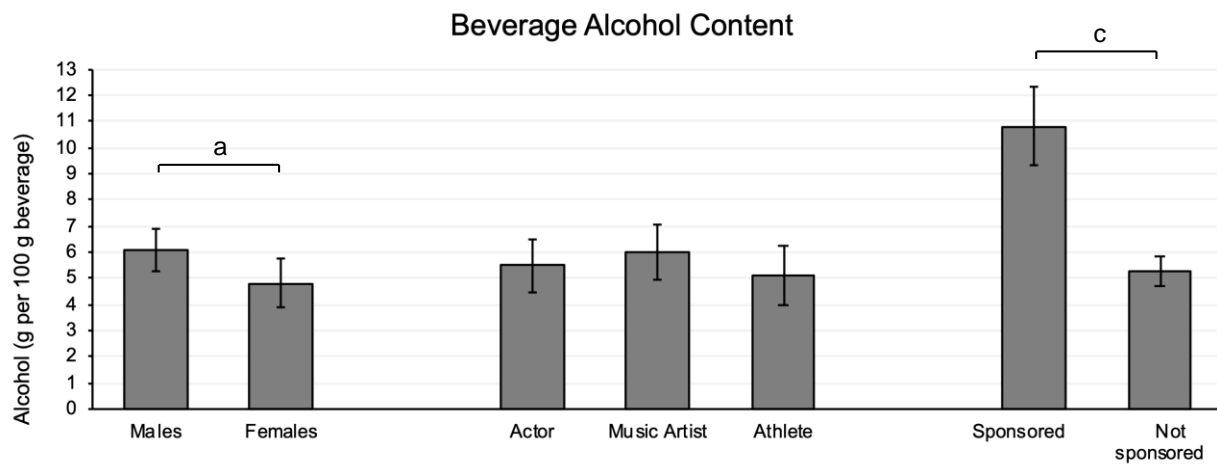

**eFigure 2. Beverage Nutrition Outcomes by Celebrity and Post Characteristics.**

Error bars represent 95% CI. <sup>a</sup> $P < .05$ , <sup>b</sup> $P < .01$ , <sup>c</sup> $P < .001$ . Sponsorship refers to sponsorship by a food or beverage-relevant company.

## eReferences

1. U.S. Department of Agriculture, Agricultural Research Service. USDA Food and Nutrient Database for Dietary Studies 2015-2016. Food Surveys Research Group Home Page. Accessed February 11, 2020. <http://www.ars.usda.gov/nea/bhnrc/fsrg>.
2. U.S. Department of Agriculture. What We Eat in America Food Categories 2015-2016. Accessed February 11, 2020. [https://www.ars.usda.gov/ARUserFiles/80400530/pdf/1516/Food\\_categories\\_2015-2016.pdf](https://www.ars.usda.gov/ARUserFiles/80400530/pdf/1516/Food_categories_2015-2016.pdf).
3. Department of Health. Guide to creating a front of pack (FoP) nutrition label for pre-packed products sold through retail outlets. Accessed January 24, 2020. [https://www.food.gov.uk/sites/default/files/media/document/fop-guidance\\_0.pdf](https://www.food.gov.uk/sites/default/files/media/document/fop-guidance_0.pdf).
